# Supplementary material for: Antibacterial sponge for rapid noncompressible hemostatic treatment: spatiotemporal studies using a noninvasive model
Source: Royal Society of Chemistry journal article supplement (doi:10.1039/d4bm00506f), 2024-01-01
Supplement: d4bm00506f4.pdf [file d4bm00506f4.pdf]

Supplementary Information for

***Antibacterial Sponge for Rapid Noncompressible Hemostatic Treatment: Spatiotemporal Studies Using a Noninvasive Model***

*Pritha Sarkar<sup>1</sup>, Abinaya Sindu Pugazhendhi<sup>2</sup>, Melanie Coathup<sup>2</sup>, Kausik Mukhopadhyay<sup>1</sup>*

*<sup>1</sup>Department of Materials Science and Engineering, University of Central Florida, Orlando, USA.*

*<sup>2</sup>Bionix Cluster and College of Medicine, University of Central Florida, Orlando, USA.*

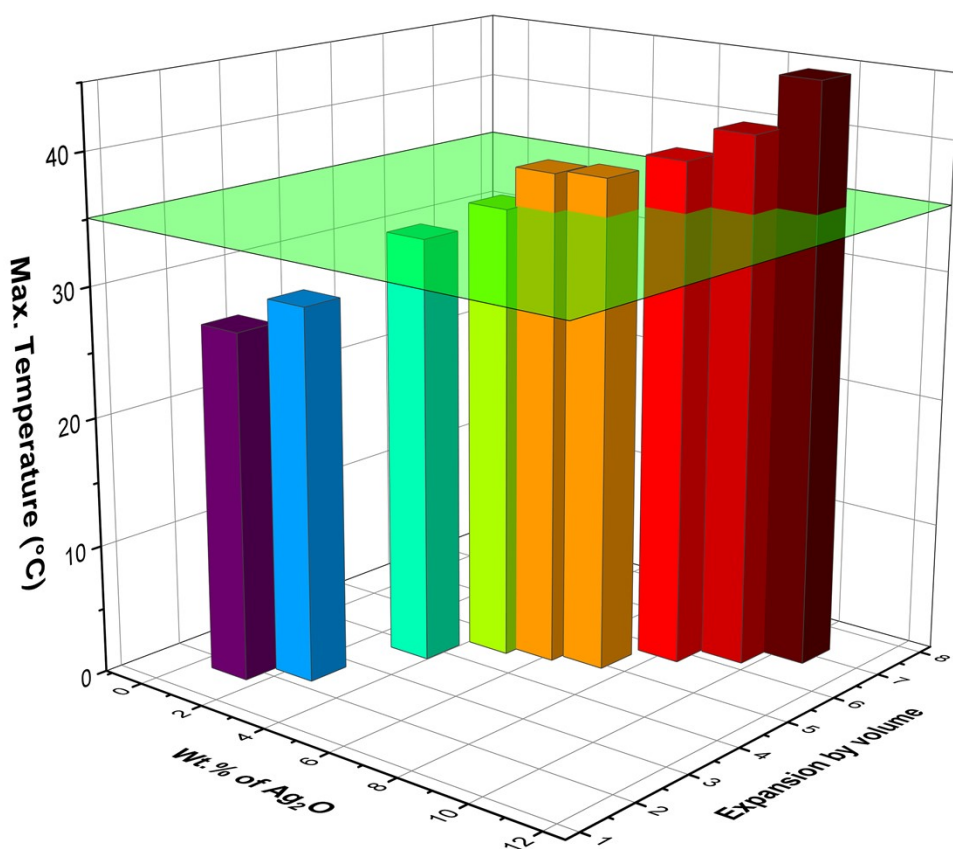

Figure S1: 3D plot showing temperature/expansion variance with concentration of Ag<sub>2</sub>O in Part A. The green plane marks 35 °C.

Table S1: Composition of SilFoam Part A and SilFoam Part B.

|                       |                  |                        |                                         |
|-----------------------|------------------|------------------------|-----------------------------------------|
| <b>SilFoam Part A</b> | <b>Wt.% PDMS</b> | <b>Wt.% Surfactant</b> | <b>Wt.% Ag<sub>2</sub>O</b>             |
|                       | 94               | 2                      | 4                                       |
| <b>SilFoam Part B</b> | <b>Wt.% PDMS</b> | <b>Wt.% Surfactant</b> | <b>Wt. % H<sub>2</sub>O<sub>2</sub></b> |
|                       | 94               | 2                      | 4                                       |

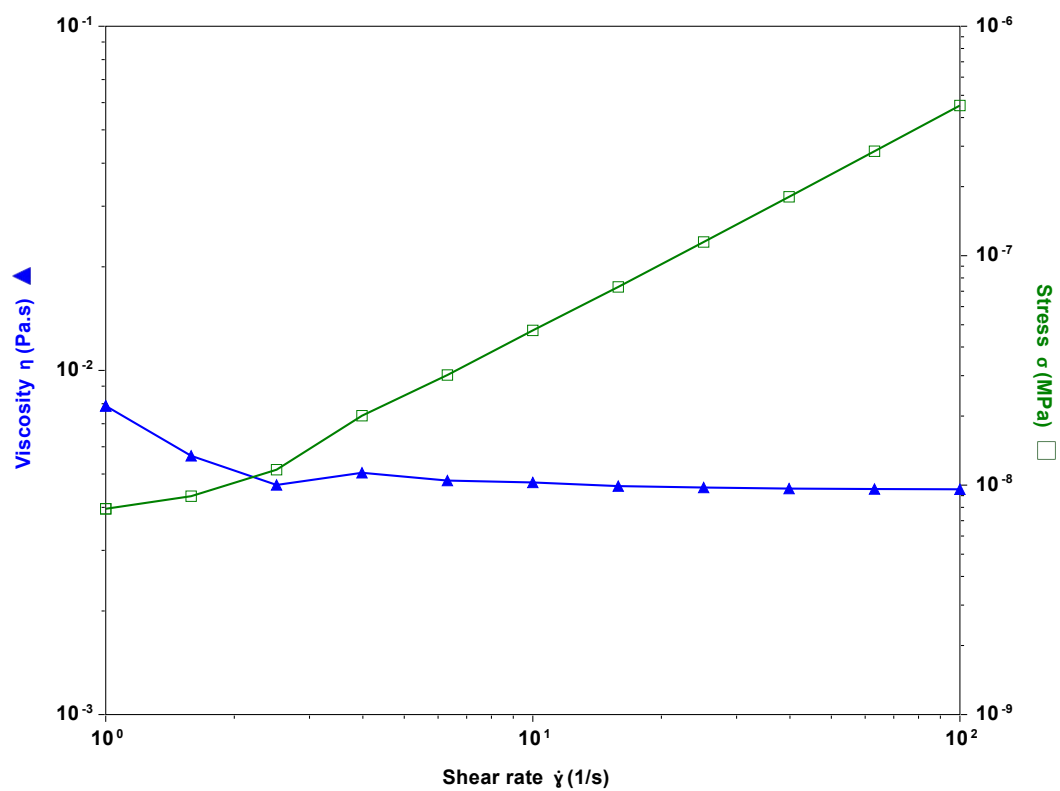

Figure S2: Viscosity of artificial blood being used. Viscosity measured to be around 4.5 cP.

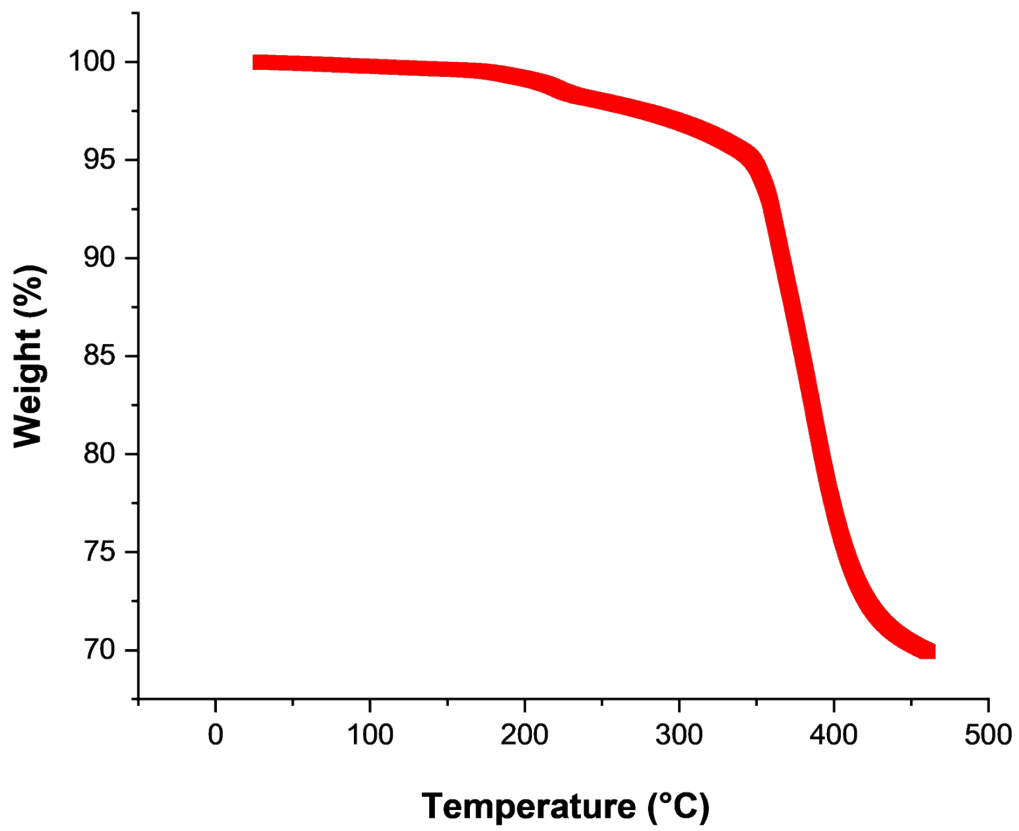

Figure S3: Thermogravimetric analysis of SilFoam. SilFoam was found to be stable up to high temperatures of 350 °C.

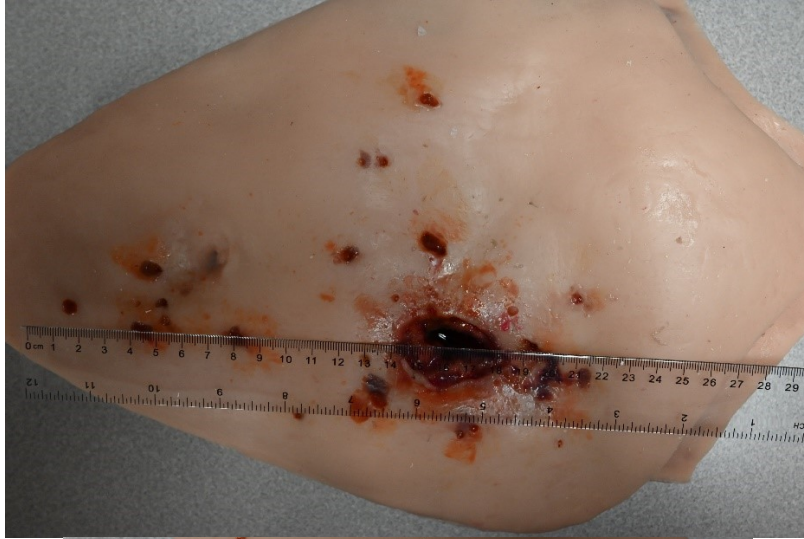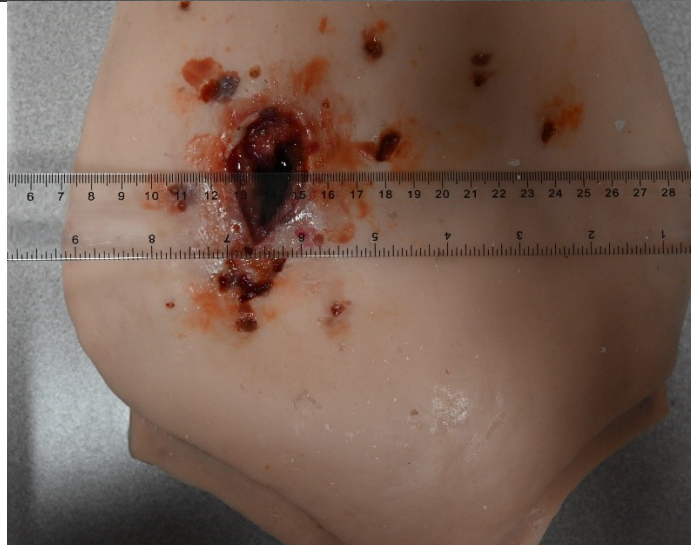

Figure S4: Image showing dimensions of simulated torso wound on the silicone manikin.

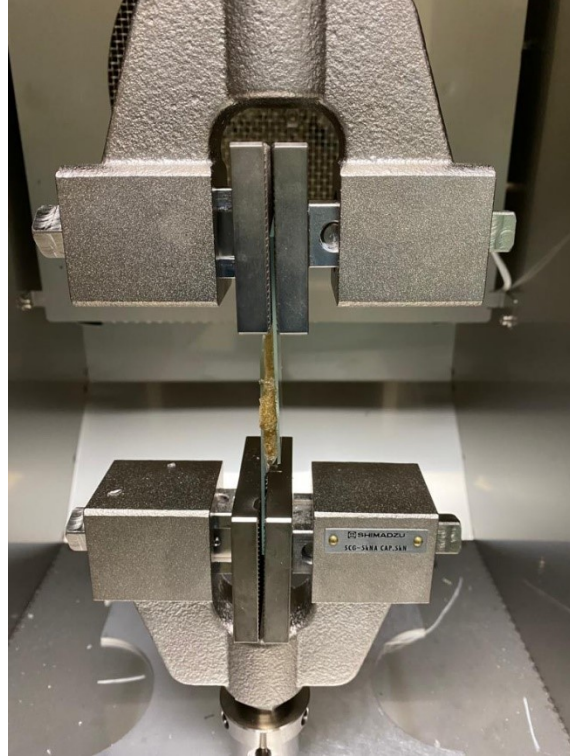

Figure S5: Lap shear testing procedure.

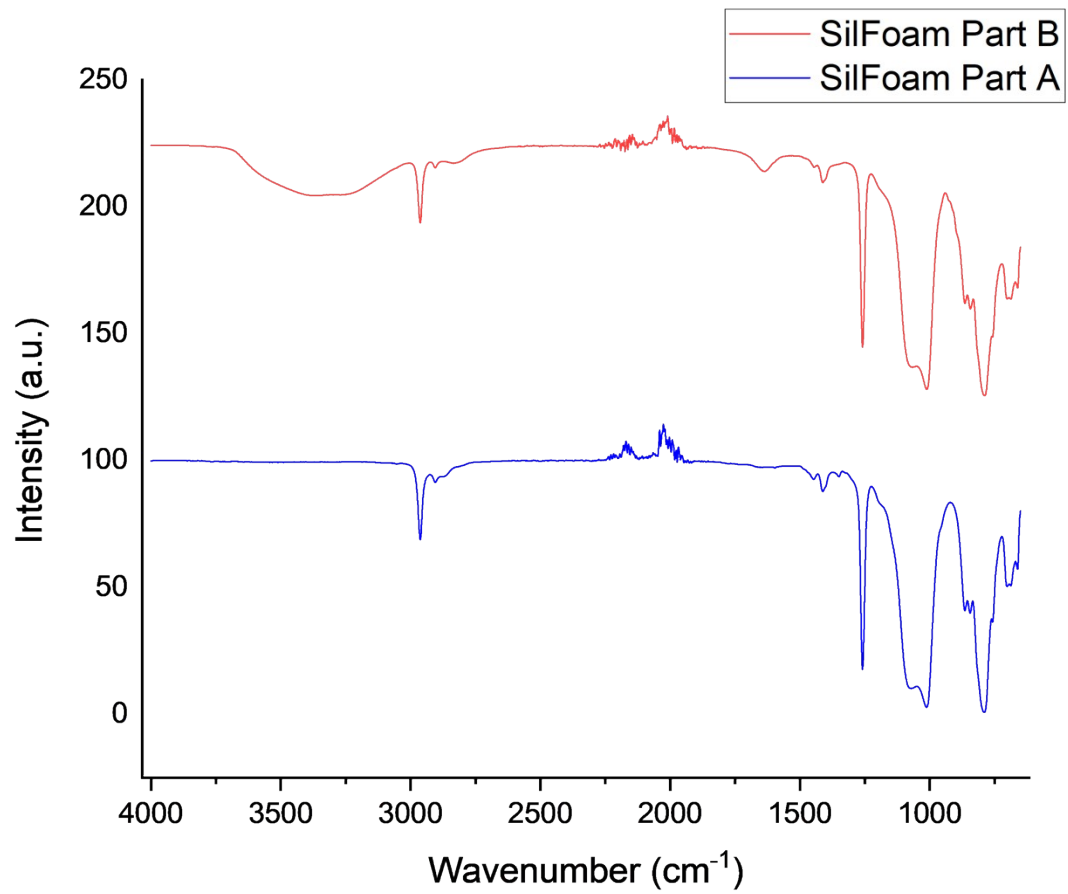

Figure S6: ATR-FTIR of SilFoam Part A and SilFoam Part B.

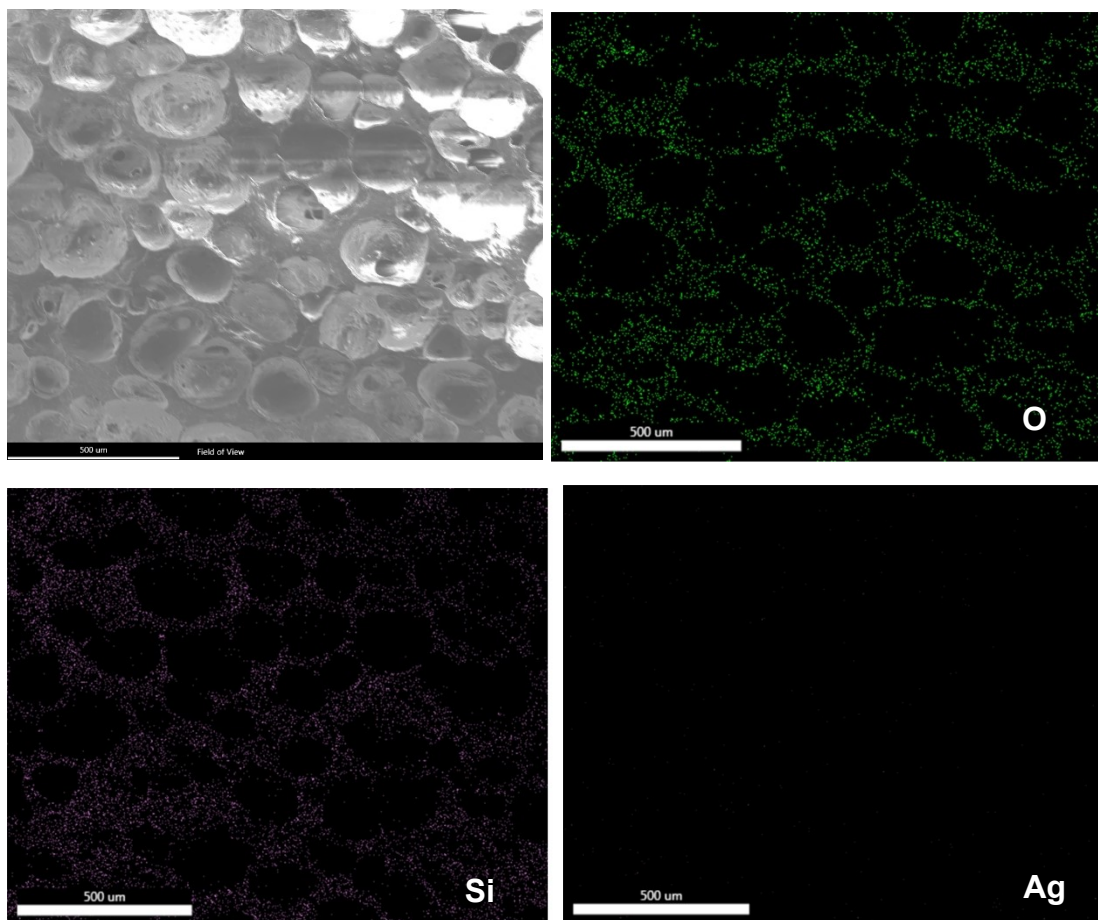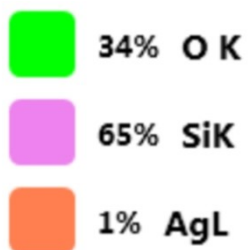

Figure S7: EDS - Elemental Mapping of SEM micrograph of SiIFoam. 65% Si and 34% O detected by EDS along with trace amounts of Ag (1%)

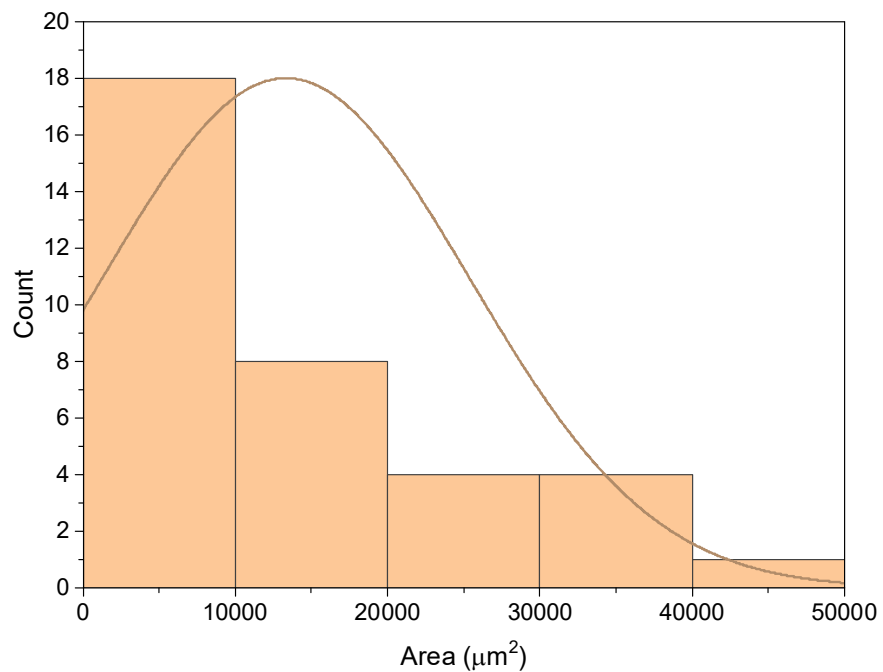

Figure S8: Pore size distribution of cross-section of preformed SilFoam.

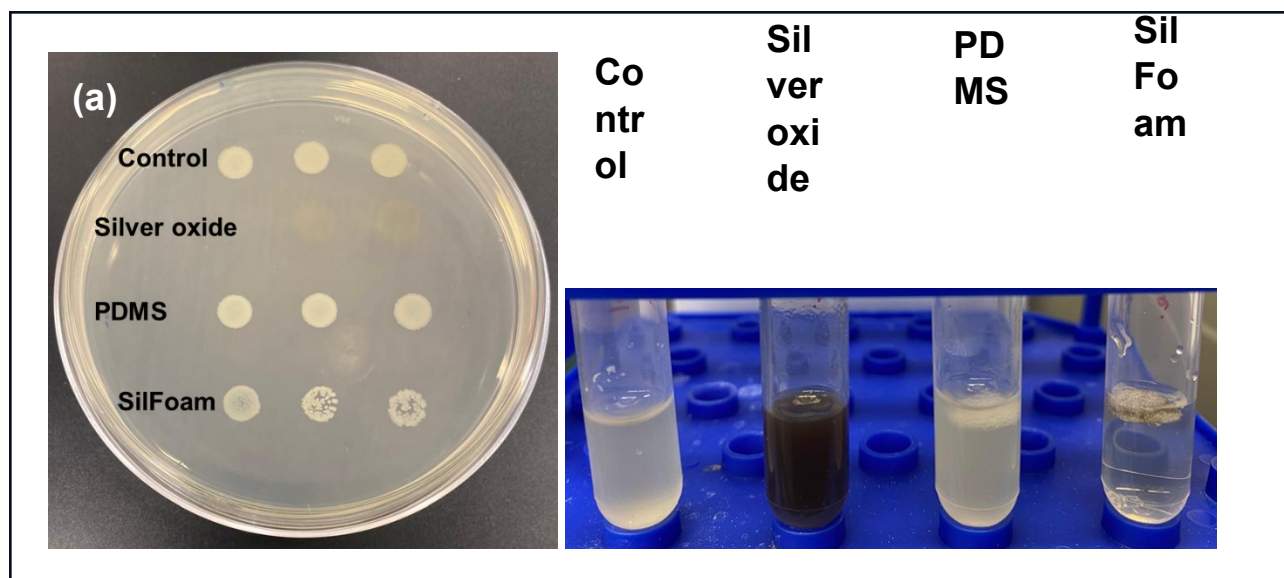



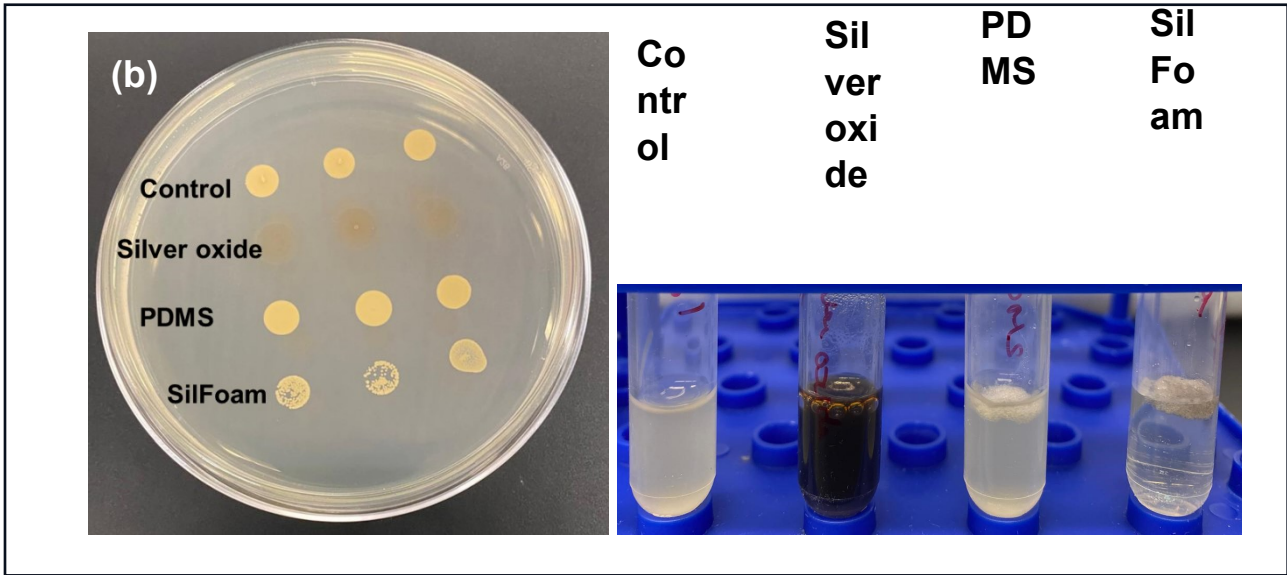

Figure S9: Colony counting assays: Bacterial growth 24 hours post 24 hours of incubation (a) *E. coli*; (b) *S. aureus*
